# Supplementary material for: Screening of Genetic Polymorphisms of CYP3A4 and CYP3A5 Genes
Source: PubMed Central journal article supplement — Korean J Physiol Pharmacol. 2013 Dec 16;17(6):479–84. doi: 10.4196/kjpp.2013.17.6.479 (PMC3874433; doi:10.4196/kjpp.2013.17.6.479), 2013-12-16
Supplement: kjpp-17-479-s001.pdf [file kjpp-17-479-s001.pdf]

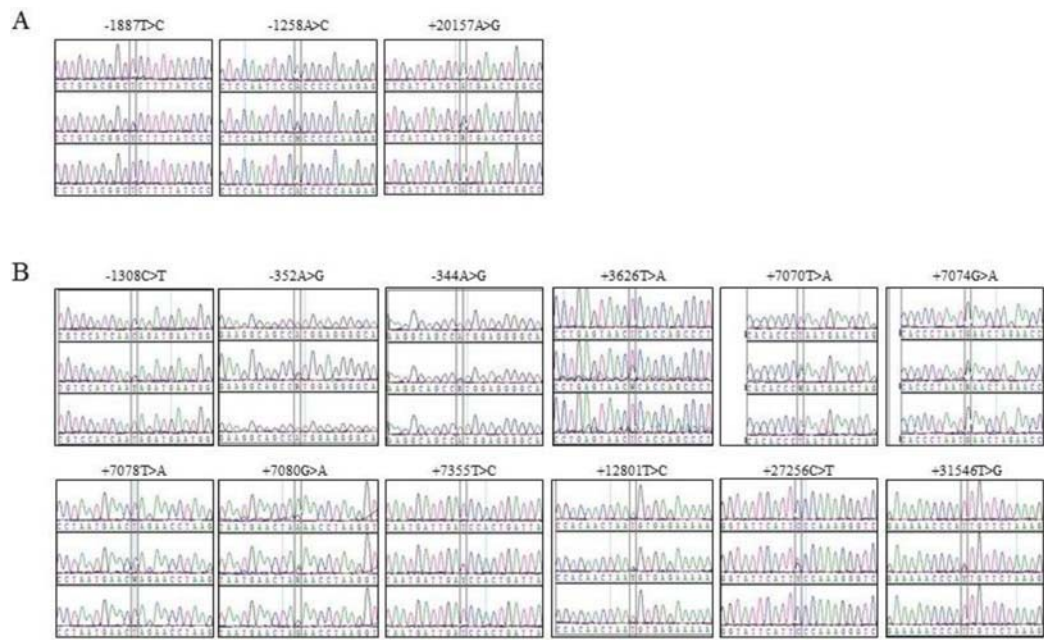

**Supplemental Fig. 1.** (A) Chromatograms of novel polymorphisms in *CYP3A4*. (B) Chromatograms of novel polymorphisms in *CYP3A5*.
