# Supplementary material for: Screening of Genetic Polymorphisms of CYP3A4 and CYP3A5 Genes
Source: PubMed Central journal article supplement — Korean J Physiol Pharmacol. 2013 Dec 16;17(6):479–84. doi: 10.4196/kjpp.2013.17.6.479 (PMC3874433; doi:10.4196/kjpp.2013.17.6.479), 2013-12-16
Supplement: kjpp-17-479-s003.pdf [file kjpp-17-479-s003.pdf]

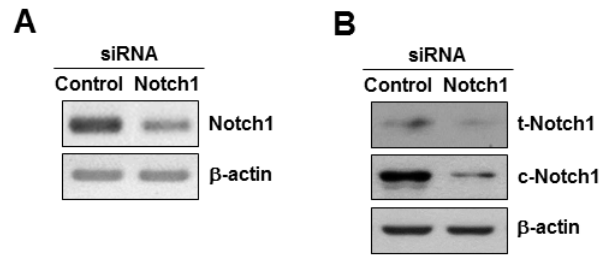

**Supplemental Fig. 3.** Notch1 silencing. MDA-MB-231 cells were transfected with siRNAs to inhibit the expression of Notch1 or with a non-targeting control for 48 h. (A) The mRNA levels of human Notch1 and  $\beta$ -actin were detected by RT-PCR analysis. (B) The protein levels of human t-Notch1, c-Notch1, and  $\beta$ -actin were detected by Western blot analysis.
