# Supplementary material for: Screening of Genetic Polymorphisms of CYP3A4 and CYP3A5 Genes
Source: PubMed Central journal article supplement — Korean J Physiol Pharmacol. 2013 Dec 16;17(6):479–84. doi: 10.4196/kjpp.2013.17.6.479 (PMC3874433; doi:10.4196/kjpp.2013.17.6.479), 2013-12-16
Supplement: kjpp-17-479-s004.pdf [file kjpp-17-479-s004.pdf]

**Supplementary Table 1.** Primer information of *CYP3A4* and *CYP3A5*.

| Gene          | Name       | Forward primer sequence (5'-3') | Reverse primer sequence (5'-3') |
|---------------|------------|---------------------------------|---------------------------------|
| <i>CYP3A4</i> | CYP3A4_1P  | TGAGCCTCAGTTTCTACATCTG          | ACCCAAGTTCTGTGTCTGCC            |
|               | CYP3A4_2P  | GGGATGGGAAAAGGTGTCTT            | TTGTGCTGCTTCCTGTGAAC            |
|               | CYP3A4_3P  | CCTTGATGCTGTGTGACCTG            | TGTAACCATTTCCCTCCCCTG           |
|               | CYP3A4_4P  | CAGAAGGGATGACATGCAGA            | GGAAGAGGCTTCTCCACCTT            |
|               | CYP3A4_5P  | GCGATTTAATAGATTTTATGCCAA        | CCCAAAGTGTGGGATTACA             |
|               | CYP3A4_6P  | GGCTTCGACTGTTTTTCATCC           | TGGAGCCTCTTTGTCTTGCT            |
|               | CYP3A4_7P  | TAAGGGATTATGTAAAGTCAG           | GGGGACAGGATGAAGTGG              |
|               | CYP3A4_8P  | AAATACATCCCAGGACACT             | GTGGACTACCCCTTGGA               |
|               | CYP3A4_9P  | AAAATGTCACTTACTGCTCC            | GGGAGACCCATTGAAGTT              |
|               | CYP3A4_10P | TCCCTTTCCAAGGGTAGTC             | CAATCACACTTTTTCCCCCT            |
|               | CYP3A4_11P | CCAGTTGAGAACCTTGATG             | CCAAACCCCACTTTCTGC              |
|               | CYP3A4_12P | CCAAGGATTTAGAAGGGTAT            | AAGTGCCTCCAACCTACCA             |
|               | CYP3A4_13P | CTAAACTGTGATGCCCTAC             | CTTTTCAGAGCCTTCCTA              |
|               | CYP3A4_14P | ATCCTTTACCAGTATGAGTTAG          | AGGCAGAATATGCTTGAA              |
|               | CYP3A4_15P | CCAGCCCACAAAAGTATC              | CACCCTTAAAGATCACAGA             |
|               | CYP3A4_16P | TTTGCCCACTTACTCCATA             | CCAAATCTACCTCCTCACA             |
|               | CYP3A4_17P | GGACTTCTGCTTTGCTCT              | GGGGTGGTGAAATAGTC               |
|               | CYP3A4_18P | GTAGAGTGTTATACTTGGGAAT          | AAACAATGGGCAAAGTCA              |
|               | CYP3A4_19P | AGTATTATCAGATGCTTTCC            | CCAGGCTTGTCTTGA                 |
| <i>CYP3A5</i> | CYP3A5_1P  | GACCTCAAACGATGAAACTGC           | TGAGGAACCTCCAAATTGTTC           |
|               | CYP3A5_2P  | GGTGCTCAACATCACTGGTC            | CAAACTGACTAAGGCCCAGA            |
|               | CYP3A5_3P  | GCACAATTCAGCCATGAAAA            | TCATGACCCTGGTTCCTAGC            |
|               | CYP3A5_4P  | CAGTGTGGCTGCATTTGAGT            | AGTCCAAGGGTCTGGGTTC             |
|               | CYP3A5_5P  | ACTCCAGGCAGAGGGAATTT            | GATTAGCACCCCAAGTCCAA            |
|               | CYP3A5_6P  | TTCACTCCAGGATTGGGACT            | GGCTGAGATTACAGGCATGA            |
|               | CYP3A5_7P  | GGTCATAGACAAGGGTGAGTCC          | TTATAACGGCAAGCAGATTCC           |
|               | CYP3A5_8P  | CTTCCCTGTTGGACCACAT             | GCGGGACAGGATGAAGAGTA            |
|               | CYP3A5_9P  | GGATCTCCATTGAGCATCTTG           | TGTGCAGACTCAAGTCCCAG            |
|               | CYP3A5_10P | ATCACAGTCCGTTTCCAAGG            | CTTTTCCCTTGCTGACTTGC            |
|               | CYP3A5_11P | CCTTCTGAGGGAGTAGATGGAA          | CAGCTAAAGTGTGTGAGGGCT           |
|               | CYP3A5_12P | TCACTGCTGTAGTGGTGTTC            | TCCTTCCCAATCTCCTTCT             |
|               | CYP3A5_13P | AAACATCCTGCTTTCCAAGG            | CACTGACTGTCTCCAAGCA             |
|               | CYP3A5_14P | ATGATTTTGCCTCATCCTGG            | TTTTTCTCTCAGAGGCTTCC            |
|               | CYP3A5_15P | TCACTGAGCACATCAATGGAC           | CAACCACAGATTGTCATGTA            |
|               | CYP3A5_16P | GATTTCATGACCAGCCAC              | TTTGAAGTCCAGAAGTGAAGCA          |
|               | CYP3A5_17P | TCAAGATACATGGTGTAAAGAGTCG       | TGAGAAGCAGAGAAGCTGAGTC          |
