# Supplementary material for: Screening of Genetic Polymorphisms of CYP3A4 and CYP3A5 Genes
Source: PubMed Central journal article supplement — Korean J Physiol Pharmacol. 2013 Dec 16;17(6):479–84. doi: 10.4196/kjpp.2013.17.6.479 (PMC3874433; doi:10.4196/kjpp.2013.17.6.479), 2013-12-16
Supplement: kjpp-17-479-s005.pdf [file kjpp-17-479-s005.pdf]

**Supplementary Table 2.** *P*-values for Hardy-Weinberg equilibrium of *CYP3A4* and *CYP3A5* polymorphisms in five ethnicities

| Gene                   | Loci                   | Korean<br>(n=96) | Han Chinese<br>(n=48) | Japanese<br>(n=48) | African-<br>American<br>(n=48) | European-<br>American<br>(n=48) |
|------------------------|------------------------|------------------|-----------------------|--------------------|--------------------------------|---------------------------------|
| <i>CYP3A4</i>          | <i>rs36231117</i>      | -                | -                     | -                  | 0.942                          | -                               |
|                        | -1887T>C <sup>†</sup>  | 0.959            | -                     | -                  | -                              | -                               |
|                        | <i>rs28907269</i>      | -                | -                     | -                  | 0.883                          | -                               |
|                        | -1258A>C <sup>†</sup>  | -                | -                     | -                  | -                              | 0.941                           |
|                        | <i>rs12114000</i>      | -                | -                     | -                  | 0.39                           | -                               |
|                        | <i>rs1851426</i>       | -                | -                     | -                  | 0.67                           | 0.761                           |
|                        | <i>rs11773597</i>      | -                | -                     | -                  | -                              | 0.644                           |
|                        | <i>rs28988569</i>      | -                | 0.942                 | -                  | -                              | -                               |
|                        | <i>rs2740574</i>       | -                | -                     | -                  | 0.726                          | 0.763                           |
|                        | <i>rs4986908</i>       | -                | 0.942                 | -                  | -                              | -                               |
|                        | <i>rs12721623</i>      | -                | -                     | -                  | -                              | 0.883                           |
|                        | <i>rs12721624</i>      | -                | -                     | -                  | 0.942                          | -                               |
|                        | <i>rs56153749</i>      | 0.835            | 0.883                 | -                  | 0.942                          | -                               |
|                        | <i>rs28371759</i>      | 0.793            | -                     | 0.942              | -                              | -                               |
|                        | +20157A>G <sup>†</sup> | -                | 0.942                 | -                  | -                              | -                               |
|                        | <i>rs2242480</i>       | 0.151            | 0.703                 | 0.015              | 0.273                          | 0.529                           |
|                        | <i>rs4986911</i>       | -                | -                     | -                  | 0.001                          | -                               |
|                        | <i>rs4986909</i>       | -                | 0.941                 | -                  | -                              | -                               |
|                        | <i>rs4986910</i>       | -                | -                     | -                  | -                              | 0.882                           |
| <i>rs4986913</i>       | -                      | 0.941            | -                     | -                  | -                              |                                 |
| <i>rs28988604</i>      | -                      | -                | -                     | 0.703              | 0.883                          |                                 |
| <i>CYP3A5</i>          | <i>rs115450823</i>     | -                | -                     | -                  | 0.326                          | -                               |
|                        | -1308C>T <sup>†</sup>  | -                | -                     | -                  | 0.326                          | -                               |
|                        | <i>rs36231118</i>      | -                | -                     | -                  | 0.599                          | 0.942                           |
|                        | <i>rs3823812</i>       | 0.108            | 0.644                 | 0.039              | 0.703                          | 0.942                           |
|                        | <i>rs28365073</i>      | -                | -                     | -                  | 0.883                          | -                               |
|                        | <i>rs28365079</i>      | -                | -                     | -                  | 0.615                          | 0.942                           |
|                        | -352A>G <sup>†</sup>   | -                | 0.942                 | -                  | -                              | -                               |
|                        | -344A>G <sup>†</sup>   | -                | 0.942                 | -                  | -                              | -                               |
|                        | <i>rs28365095</i>      | -                | -                     | -                  | -                              | 0.823                           |
|                        | <i>rs28371764</i>      | -                | 0.942                 | -                  | 0.942                          | 0.045                           |
|                        | +3626T>A <sup>†</sup>  | 0.918            | -                     | -                  | -                              | -                               |
|                        | <i>rs28365067</i>      | 0.835            | 0.883                 | 0.00001            | -                              | 0.644                           |
|                        | <i>rs41301652</i>      | -                | -                     | -                  | 0.942                          | -                               |
|                        | <i>rs28969392</i>      | -                | -                     | -                  | 0.941                          | -                               |
|                        | <i>rs776746</i>        | 0.688            | 0.395                 | 0.091              | 0.424                          | 0.524                           |
|                        | +7070T>A <sup>†</sup>  | -                | 0.941                 | -                  | -                              | 0.942                           |
|                        | +7074G>A <sup>†</sup>  | -                | -                     | 0.88               | -                              | -                               |
|                        | +7078T>A <sup>†</sup>  | -                | -                     | -                  | 0.942                          | -                               |
|                        | +7080G>A <sup>†</sup>  | -                | 0.00001               | -                  | -                              | -                               |
|                        | <i>rs28365078</i>      | -                | -                     | 0.941              | -                              | -                               |
|                        | <i>rs8175345</i>       | -                | -                     | -                  | 0.763                          | 0.942                           |
|                        | +7355T>C <sup>†</sup>  | -                | -                     | -                  | 0.942                          | -                               |
|                        | +12801T>C <sup>†</sup> | -                | -                     | -                  | -                              | 0.942                           |
|                        | <i>rs55965422</i>      | 0.876            | 0.94                  | -                  | -                              | -                               |
|                        | <i>rs10264272</i>      | -                | 0.942                 | -                  | 0.767                          | -                               |
|                        | <i>rs28383472</i>      | -                | -                     | -                  | 0.112                          | -                               |
|                        | <i>rs41303322</i>      | -                | -                     | -                  | 0.362                          | -                               |
|                        | <i>rs28383478</i>      | -                | -                     | -                  | -                              | 0.942                           |
|                        | <i>rs4646453</i>       | 0.326            | 0.795                 | 0.029              | 0.763                          | 0.942                           |
|                        | <i>rs28383479</i>      | -                | -                     | -                  | -                              | 0.942                           |
|                        | <i>rs28365094</i>      | -                | -                     | 0.942              | 0.941                          | 0.529                           |
|                        | <i>rs41303343</i>      | -                | -                     | -                  | 0.237                          | -                               |
|                        | +27256C>T <sup>†</sup> | 0.959            | -                     | -                  | -                              | -                               |
| <i>rs28365069</i>      | -                      | -                | -                     | 0.823              | -                              |                                 |
| +31546T>G <sup>†</sup> | 0.959                  | 0.883            | -                     | -                  | -                              |                                 |
| <i>rs15524</i>         | 0.862                  | 0.997            | 0.046                 | 0.699              | 0.823                          |                                 |

Variants which are monomorphic in all ethnicities are not shown in the Table. A hyphen (-) indicates that the variant was monomorphic in the particular ethnicity.

<sup>†</sup>These polymorphisms were newly identified in this study.
